# Supplementary material
Source: publisher figshare collection journal article supplement (https://tandf.figshare.com/ndownloader/files/15326405)
Supplement: Supplementary file 1 [file 15326405]

## Supplementary Material

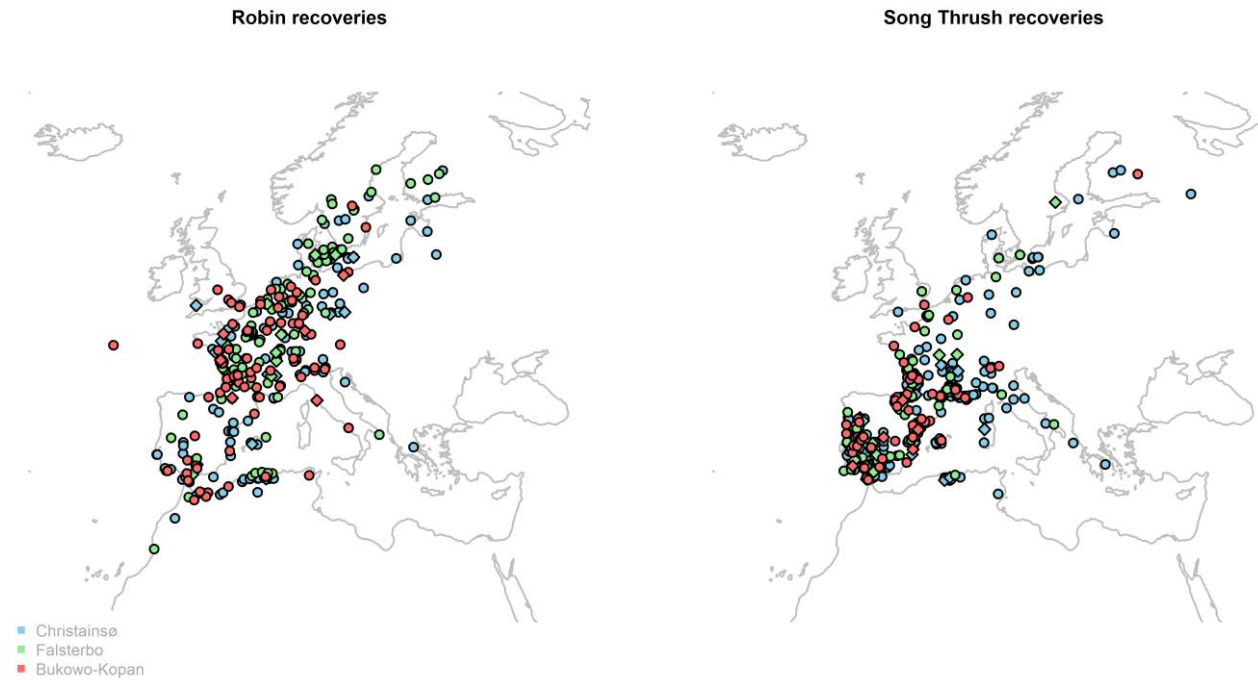

**Fig. S1** Distribution of dead only recoveries from ringing data used in this analysis for Robin and Song Thrush. Birds ringed at each of the three ringing stations are denoted by colour and those ringed as immature birds as ● and as adults ◆.

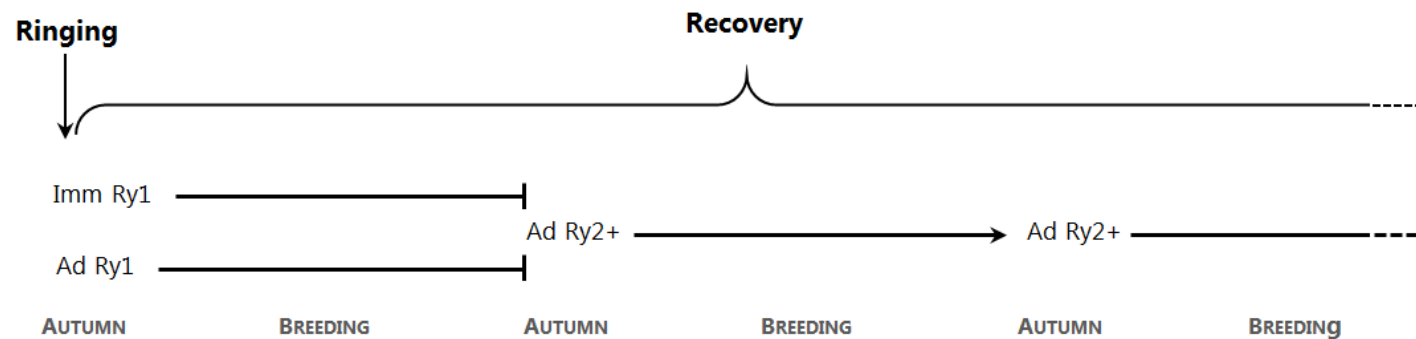

**Fig. S2** Survival model conceptual diagram of TimeAge parameters. All years are combined, as such time is the interval following ringing. Birds ringed in autumn and recovered within 12 months are classed as Ry1, whereby those ringed as adults are Ad and those in their first year as Imm, in all following 12 month periods; all birds are recovered as adults and the second or more years after ringing.

|                            |          | Robin                                                                                       |         |                                                                                               |         |                                                                                                   |         | Song Thrush                                                                                   |         |                                                                                                 |        |                                                                                                   |        |
|----------------------------|----------|---------------------------------------------------------------------------------------------|---------|-----------------------------------------------------------------------------------------------|---------|---------------------------------------------------------------------------------------------------|---------|-----------------------------------------------------------------------------------------------|---------|-------------------------------------------------------------------------------------------------|--------|---------------------------------------------------------------------------------------------------|--------|
|                            |          | Falsterbo  |         | Christainsø  |         | Bukowo- Kopań  |         | Falsterbo  |         | Christainsø  |        | Bukowo- Kopań  |        |
| model                      |          | S                                                                                           | ± S.E.  | S                                                                                             | ± S.E.  | S                                                                                                 | ± S.E.  | S                                                                                             | ± S.E.  | S                                                                                               | ± S.E. | S                                                                                                 | ± S.E. |
| S(Age*Site)<br>r(Site)     | Ad       | 0.273                                                                                       | 0.067   | 0.354                                                                                         | 0.059   | 0.433                                                                                             | 0.081   | 0.510                                                                                         | 0.056   | 0.469                                                                                           | 0.038  | 0.457                                                                                             | 0.077  |
|                            | Imm      | 0.185                                                                                       | 0.037   | 0.215                                                                                         | 0.036   | 0.211                                                                                             | 0.046   | 0.364                                                                                         | 0.051   | 0.336                                                                                           | 0.031  | 0.317                                                                                             | 0.060  |
|                            |          | r                                                                                           | ± S.E.  | r                                                                                             | ± S.E.  | r                                                                                                 | ± S.E.  | R                                                                                             | ± S.E.  | r                                                                                               | ± S.E. | r                                                                                                 | ± S.E. |
|                            | Combined | 0.00141                                                                                     | 0.00013 | 0.00148                                                                                       | 0.00012 | 0.00129                                                                                           | 0.00014 | 0.0109                                                                                        | 0.00109 | 0.0097                                                                                          | 0.0006 | 0.0082                                                                                            | 0.0010 |
| S(TimeAge*Site)<br>r(Site) |          | S                                                                                           | ± S.E.  | S                                                                                             | ± S.E.  | S                                                                                                 | ± S.E.  | S                                                                                             | ± S.E.  | S                                                                                               | ± S.E. | S                                                                                                 | ± S.E. |
|                            | Ad Ry1   | 0.083                                                                                       | 0.080   | 0.143                                                                                         | 0.094   | 0.167                                                                                             | 0.152   | 0.637                                                                                         | 0.145   | 0.445                                                                                           | 0.117  | 0.400                                                                                             | 0.219  |
|                            | Ad Ry2   | 0.344                                                                                       | 0.084   | 0.4129                                                                                        | 0.070   | 0.472                                                                                             | 0.091   | 0.490                                                                                         | 0.059   | 0.472                                                                                           | 0.041  | 0.464                                                                                             | 0.082  |
|                            | Imm      | 0.185                                                                                       | 0.037   | 0.215                                                                                         | 0.036   | 0.211                                                                                             | 0.046   | 0.364                                                                                         | 0.051   | 0.336                                                                                           | 0.031  | 0.317                                                                                             | 0.060  |
|                            |          | r                                                                                           | ± S.E.  | r                                                                                             | ± S.E.  | r                                                                                                 | ± S.E.  | R                                                                                             | ± S.E.  | r                                                                                               | ± S.E. | r                                                                                                 | ± S.E. |
|                            | Combined | 0.00141                                                                                     | 0.00013 | 0.00148                                                                                       | 0.00012 | 0.00129                                                                                           | 0.00014 | 0.0109                                                                                        | 0.00109 | 0.0097                                                                                          | 0.0006 | 0.0082                                                                                            | 0.0010 |

**Table S1** Survival (S) and recovery (r) estimates for classic two-age and site model {S(Age\*Site)r(Site)}, for adults and immature birds for 12 month intervals when ringed at each site.
